# Supplementary material for: Computational discovery of stable Na-ion sulfide solid electrolytes with high conductivity at room temperature
Source: Royal Society of Chemistry journal article supplement (doi:10.1039/d4ta02522a), 2024-01-01
Supplement: d4ta02522a1.pdf [file d4ta02522a1.pdf]

## Supporting Information

# Computational Discovery of Stable Na-ion Sulfide Solid Electrolytes with High Conductivity at Room Temperature

*Seong-Hoon Jang,<sup>1,2\*</sup> Randy Jalem,<sup>2</sup> and Yoshitaka Tateyama<sup>2,3</sup>*

<sup>1</sup> Institute for Materials Research, Tohoku University, 2-1-1 Katahira, Aoba-ku, Sendai, 980-8577, Japan

<sup>2</sup> Research Center for Energy and Environmental Materials (GREEN), National Institute for Materials Science (NIMS), 1-1 Namiki, Tsukuba, Ibaraki 305-0044, Japan

<sup>3</sup> Laboratory for Chemistry and Life Science, Tokyo Institute of Technology, 4259 Nagatsuta, Midori-ku, Yokohama, 226-8501, Japan

\*Corresponding author: [jang.seonghoon.b4@tohoku.ac.jp](mailto:jang.seonghoon.b4@tohoku.ac.jp)

## Discussion S1 Details of sampling protocol

**Sampling space.** The space group for each  $\Omega$  is as follows:  $Na_5AlS_4$  (with the orthorhombic  $Pbca$  symmetry),<sup>1, 2</sup>  $Na_5InS_4$  (monoclinic  $P2_1/m$ ),<sup>3</sup>  $Na_{4.5}Al_{0.5}Si_{0.5}S_4$  (monoclinic  $Cc$ ),<sup>1</sup>  $Na_4SiS_4$  (orthorhombic  $P2_12_12_1$ ),<sup>1, 4-6</sup>  $Na_4SnS_4$  (tetragonal  $P\bar{4}2_1c$ ),<sup>7-9</sup>  $Na_3VS_4$  (tetragonal  $P\bar{4}2_1c$ ),<sup>10-12</sup> and  $Na_3SbS_4$  (tetragonal  $P\bar{4}2_1c$ ).<sup>1, 13-15</sup>

**Ewald summation sampling.** 112 cases of  $(M, M', \Omega)$  at  $m = m' = 0.5$  were taken in total: 105 cases of  $Na_4M_{0.5}M'_{0.5}S_4$  for  $v(M) = 3$  and  $v(M') = 5$  and 7 cases of  $Na_{3.5}Si_{0.5}Ta_{0.5}S_4$ . We conducted supercell operations on the abovementioned parent structures. We modified the number of Na-ions when necessary, and replaced host metal ion sites with  $M$  and  $M'$ . This resulted in supercells with varying numbers of ion sites: 144 for  $\Omega = Na_5AlS_4$ ,  $Na_5InS_4$ ,  $Na_{4.5}Al_{0.5}Si_{0.5}S_4$ ,  $Na_3VS_4$ , and  $Na_3SbS_4$  and 216 for  $\Omega = Na_4SiS_4$  and  $Na_4SnS_4$  with  $v(M) = 3$  and  $v(M') = 5$ ; 136 for  $\Omega = Na_5AlS_4$ ,  $Na_5InS_4$ ,  $Na_{4.5}Al_{0.5}Si_{0.5}S_4$ ,  $Na_4SnS_4$ ,  $Na_3VS_4$ , and  $Na_3SbS_4$  and 204 for  $Na_4SiS_4$  with  $Na_{3.5}Si_{0.5}Ta_{0.5}S_4$ .

For each  $\Omega$  with  $v(M) = 3$  and  $v(M') = 5$  (or with  $Na_{3.5}Si_{0.5}Ta_{0.5}S_4$ ), a substantial number of random site arrangements was generated, ranging from 18,200 to 623,551,500 (from 33,124,000 to 2,460,781,960) and giving a total dataset size of  $n_{data} = 5,290,074,920$ . From these site arrangements, we selected less than 6 site arrangements with lowest Ewald Coulombic energies  $E_{Ewald}$  for each case of  $Na_4M_{0.5}M'_{0.5}S_4$  or  $Na_{3.5}Si_{0.5}Ta_{0.5}S_4$  ( $n_{data} = 469$ ).<sup>16-18</sup> In the subsequent step of DFT geometry optimizations, we fully relaxed the site positions and lattice parameters for the selected site arrangements. The cell structure with the lowest DFT energy  $E_{DFT}$  or, equivalently, the lowest  $E_{hull}$ , was chosen as the representative sample for each case of  $Na_4M_{0.5}M'_{0.5}S_4$  or  $Na_{3.5}Si_{0.5}Ta_{0.5}S_4$  for the succeeding DFT-MD sampling ( $n_{data} = 16$ ).

**Geometry optimization with DFT.** This step was performed by using the Vienna Ab Initio Simulation Package (VASP). We employed the generalized gradient approximation (GGA) and the projector augmented wave (PAW) method basis set.<sup>19-23</sup> The geometry optimizations included both site positions and lattice constants. Monkhorst-Pack  $k$ -grids were set at  $2 \times 2 \times 2$ ,<sup>24</sup> and the kinetic energy cutoff of 520 eV was used. Convergence criteria of  $< 0.01$  eV·Å<sup>-1</sup> for forces and  $< 10^{-5}$  eV·atom<sup>-1</sup> for energy were applied. Some pseudopotentials included semicore electrons as valence states for specific elements: Ca, Sc, and Zr (semicore  $s$  electrons); Na, V, Nb, and Ta ( $p$ ); and Ga, In, and Sn ( $d$ ). For the other elements, standard pseudopotential forms were employed. Then, the lowest-energy structure sample for each investigated composition was selected for subsequent DFT-MD calculations, wherein we calculated  $E_{hull}$  for all the samples by using the Computational Phase Diagram App provided by MaterialsProject.org<sup>25, 26</sup> to verify their thermodynamic (meta)stability. Bandgap energies  $E_g$  were also examined for some of the samples by using Heyd-Scuseria-Ernzerhof hybrid functionals (HSE06) provided under VASP.<sup>27</sup>

**DFT-MD for the single-temperature “long-time” diagnosis.** The single-temperature “long-time” diagnosis was carried out at  $T = 300$  K given the geometry-optimized cell structures described above. First, a total of 10,000 DFT-MD steps (10 ps) were performed to ensure thermal equilibrations by using the Nosé-Hoover thermostat ( $NVT$  ensemble) implemented in VASP.<sup>28, 29</sup> Subsequently, DFT-MD production runs were executed for trajectory sampling over  $\tau = 250$  ps ( $NVT$ ). Throughout the DFT-MD calculations,  $\Delta\tau = 1$  fs, a  $1 \times 1 \times 1$   $k$ -grid (that is,  $\Gamma$  only), and a kinetic energy cutoff of 400 eV were employed. The pseudopotentials were used in their standard forms except for Nb (with semicore  $p$  electrons), and the calculations were performed using the GGA and the PAW method basis set.<sup>19-23</sup>

From the sampled trajectories, the Na-ion self-diffusion coefficients  $D_{Na,T} = M_s/(2d)$  at  $T$  were estimated by conducting regression analyses on the mean squared displacement (MSD) curves against sampled time intervals  $\Delta\tau_{MSD}$ ;  $D_{Na,T}$  was obtained as the slope  $M_s$  of the MSD- $\Delta\tau_{MSD}$  regression line at  $T$ , considering the three-dimensional nature of Na-ion diffusion ( $d = 3$ ). Then, the Na-ion ionic conductivity  $\sigma_{Na,T}$  at  $T$  is estimated by using the Nernst-Einstein equation

$$\sigma_{Na,T} = \frac{(z_{Na}F)^2 \rho_{Na}}{RT} D_{Na,T}, \quad (S1)$$

where  $z_{Na}$  ( $=+1$ ) is the valence for a Na-ion,  $\rho_{Na}$  is the Na-ion density, and  $F$  and  $R$  denote the Faraday constant and the gas constant, respectively.

**DFT-MD for multi-temperature calculations.** The multi-temperature DFT-MD calculations were conducted at  $T = 500, 600, 700, 800,$  and  $900$  K for  $Na_4SiS_4$ ,  $Na_4Ga_{0.125}Si_{0.75}P_{0.125}S_4$ ,  $Na_4Ga_{0.25}Si_{0.5}P_{0.25}S_4$ ,  $Na_4Ga_{0.375}Si_{0.25}P_{0.375}S_4$ ,  $Na_4Ga_{0.5}P_{0.5}S_4$ ,  $Na_{3.75}Ga_{0.375}P_{0.625}S_4$ ,  $Na_{4.25}Ga_{0.625}P_{0.375}S_4$ ,  $Na_{3.875}Si_{0.875}Ta_{0.125}S_4$ ,  $Na_{3.75}Si_{0.75}Ta_{0.25}S_4$ ,  $Na_{3.625}Si_{0.625}Ta_{0.375}S_4$ , and  $Na_{3.5}Si_{0.5}Ta_{0.5}S_4$  with  $\Omega = Na_4SiS_4$ . First, a total of 40,000 DFT-MD steps (40 ps) were performed to achieve thermal and volume equilibrations by using the Langevin thermostat with the Parinello-Rahman algorithm ( $NpT$  ensemble) implemented in VASP.<sup>30, 31</sup> During this process, the averaged lattice constants were calculated over the last 10,000 DFT-MD steps (30 - 40 ps) to account cell volumes expanded thermally. Subsequently, with the averaged lattice constants, thermal equilibration runs were repeated for 10,000 DFT-MD steps (10 ps) under the Nosé-Hoover thermostat ( $NVT$ ). Finally, product runs were conducted afterwards for trajectory sampling over  $\tau = 100$  ps ( $NVT$ ). Meanwhile, the choices of  $\Delta\tau$ , the  $k$ -grid, the kinetic energy cutoff,

and the pseudopotentials and the post-process for  $D_{Na,T}$  and  $\sigma_{Na,T}$  were common to those of the DFT-MD for the single-temperature “long-time” diagnosis



|                                                                      |                                                                    |                                                                      |        |        |        |        |        |        |        |      |
|----------------------------------------------------------------------|--------------------------------------------------------------------|----------------------------------------------------------------------|--------|--------|--------|--------|--------|--------|--------|------|
| Na <sub>4</sub> Ga <sub>0.5</sub> Sb <sub>0.5</sub> S <sub>4</sub>   | Na <sub>64</sub> Ga <sub>8</sub> Sb <sub>8</sub> S <sub>64</sub>   | Na <sub>3</sub> SbS <sub>4</sub>                                     | 20.325 | 13.580 | 20.759 | 90.656 | 89.115 | 90.377 | 5728.5 | 44.2 |
| Na <sub>4</sub> Ga <sub>0.5</sub> Ta <sub>0.5</sub> S <sub>4</sub>   | Na <sub>64</sub> Ga <sub>8</sub> Ta <sub>8</sub> S <sub>64</sub>   | Na <sub>5</sub> AlS <sub>4</sub>                                     | 12.176 | 14.211 | 21.575 | 91.189 | 89.572 | 89.006 | 3731.9 | 35.9 |
| Na <sub>4</sub> Ga <sub>0.5</sub> Ta <sub>0.5</sub> S <sub>4</sub>   | Na <sub>64</sub> Ga <sub>8</sub> Ta <sub>8</sub> S <sub>64</sub>   | Na <sub>3</sub> InS <sub>4</sub>                                     | 13.968 | 17.881 | 14.766 | 88.324 | 87.413 | 89.145 | 3682.3 | 27.7 |
| Na <sub>4</sub> Ga <sub>0.5</sub> Ta <sub>0.5</sub> S <sub>4</sub>   | Na <sub>96</sub> Ga <sub>12</sub> Ta <sub>12</sub> S <sub>96</sub> | Na <sub>4.5</sub> Al <sub>0.5</sub> Si <sub>0.5</sub> S <sub>4</sub> | 17.942 | 13.951 | 14.539 | 89.594 | 93.122 | 89.533 | 3633.7 | 22.1 |
| Na <sub>4</sub> Ga <sub>0.5</sub> Ta <sub>0.5</sub> S <sub>4</sub>   | Na <sub>96</sub> Ga <sub>12</sub> Ta <sub>12</sub> S <sub>96</sub> | Na <sub>4</sub> SiS <sub>4</sub>                                     | 42.303 | 8.9968 | 14.106 | 90.028 | 90.293 | 90.068 | 5368.5 | 19.7 |
| Na <sub>4</sub> Ga <sub>0.5</sub> Ta <sub>0.5</sub> S <sub>4</sub>   | Na <sub>64</sub> Ga <sub>8</sub> Ta <sub>8</sub> S <sub>64</sub>   | Na <sub>4</sub> SnS <sub>4</sub>                                     | 15.698 | 15.698 | 13.896 | 90.000 | 90.000 | 90.000 | 3424.6 | 20.6 |
| Na <sub>4</sub> Ga <sub>0.5</sub> Ta <sub>0.5</sub> S <sub>4</sub>   | Na <sub>64</sub> Ga <sub>8</sub> Ta <sub>8</sub> S <sub>64</sub>   | Na <sub>3</sub> VS <sub>4</sub>                                      | 14.759 | 14.822 | 16.418 | 89.175 | 87.358 | 89.305 | 3587.1 | 56.3 |
| Na <sub>4</sub> Ga <sub>0.5</sub> Ta <sub>0.5</sub> S <sub>4</sub>   | Na <sub>64</sub> Ga <sub>8</sub> Ta <sub>8</sub> S <sub>64</sub>   | Na <sub>3</sub> SbS <sub>4</sub>                                     | 19.927 | 13.099 | 21.395 | 91.280 | 90.020 | 90.630 | 5582.6 | 44.5 |
| Na <sub>4</sub> In <sub>0.5</sub> P <sub>0.5</sub> S <sub>4</sub>    | Na <sub>64</sub> In <sub>8</sub> P <sub>8</sub> S <sub>64</sub>    | Na <sub>5</sub> AlS <sub>4</sub>                                     | 11.758 | 14.352 | 21.597 | 92.324 | 90.350 | 89.461 | 3641.1 | 51.8 |
| Na <sub>4</sub> In <sub>0.5</sub> P <sub>0.5</sub> S <sub>4</sub>    | Na <sub>64</sub> In <sub>8</sub> P <sub>8</sub> S <sub>64</sub>    | Na <sub>3</sub> InS <sub>4</sub>                                     | 13.861 | 18.128 | 14.778 | 89.377 | 86.092 | 89.224 | 3704.0 | 33.7 |
| Na <sub>4</sub> In <sub>0.5</sub> P <sub>0.5</sub> S <sub>4</sub>    | Na <sub>64</sub> In <sub>8</sub> P <sub>8</sub> S <sub>64</sub>    | Na <sub>4.5</sub> Al <sub>0.5</sub> Si <sub>0.5</sub> S <sub>4</sub> | 17.824 | 14.209 | 14.613 | 90.834 | 94.312 | 90.583 | 3689.9 | 42.7 |
| Na <sub>4</sub> In <sub>0.5</sub> P <sub>0.5</sub> S <sub>4</sub>    | Na <sub>96</sub> In <sub>12</sub> P <sub>12</sub> S <sub>96</sub>  | Na <sub>4</sub> SiS <sub>4</sub>                                     | 42.123 | 9.1717 | 13.892 | 89.908 | 90.168 | 90.030 | 5366.9 | 31.1 |
| Na <sub>4</sub> In <sub>0.5</sub> P <sub>0.5</sub> S <sub>4</sub>    | Na <sub>96</sub> In <sub>12</sub> P <sub>12</sub> S <sub>96</sub>  | Na <sub>4</sub> SnS <sub>4</sub>                                     | 15.933 | 15.933 | 13.645 | 90.000 | 90.000 | 90.000 | 3463.9 | 30.8 |
| Na <sub>4</sub> In <sub>0.5</sub> P <sub>0.5</sub> S <sub>4</sub>    | Na <sub>64</sub> In <sub>8</sub> P <sub>8</sub> S <sub>64</sub>    | Na <sub>3</sub> VS <sub>4</sub>                                      | 14.500 | 15.823 | 15.860 | 88.948 | 92.706 | 88.796 | 3633.4 | 55.1 |
| Na <sub>4</sub> In <sub>0.5</sub> P <sub>0.5</sub> S <sub>4</sub>    | Na <sub>64</sub> In <sub>8</sub> P <sub>8</sub> S <sub>64</sub>    | Na <sub>3</sub> SbS <sub>4</sub>                                     | 20.314 | 13.460 | 20.538 | 90.131 | 90.212 | 89.445 | 5615.3 | 59.8 |
| Na <sub>4</sub> In <sub>0.5</sub> V <sub>0.5</sub> S <sub>4</sub>    | Na <sub>64</sub> In <sub>8</sub> V <sub>8</sub> S <sub>64</sub>    | Na <sub>5</sub> AlS <sub>4</sub>                                     | 11.772 | 14.432 | 21.640 | 91.785 | 89.711 | 89.663 | 3674.7 | 55.4 |
| Na <sub>4</sub> In <sub>0.5</sub> V <sub>0.5</sub> S <sub>4</sub>    | Na <sub>64</sub> In <sub>8</sub> V <sub>8</sub> S <sub>64</sub>    | Na <sub>3</sub> InS <sub>4</sub>                                     | 13.691 | 17.872 | 15.051 | 89.244 | 87.699 | 89.753 | 3679.4 | 44.4 |
| Na <sub>4</sub> In <sub>0.5</sub> V <sub>0.5</sub> S <sub>4</sub>    | Na <sub>64</sub> In <sub>8</sub> V <sub>8</sub> S <sub>64</sub>    | Na <sub>4.5</sub> Al <sub>0.5</sub> Si <sub>0.5</sub> S <sub>4</sub> | 17.978 | 13.904 | 14.606 | 89.676 | 93.832 | 89.813 | 3642.7 | 44.8 |
| Na <sub>4</sub> In <sub>0.5</sub> V <sub>0.5</sub> S <sub>4</sub>    | Na <sub>96</sub> In <sub>12</sub> V <sub>12</sub> S <sub>96</sub>  | Na <sub>4</sub> SiS <sub>4</sub>                                     | 42.274 | 9.0120 | 14.086 | 89.936 | 90.260 | 90.002 | 5366.3 | 37.1 |
| Na <sub>4</sub> In <sub>0.5</sub> V <sub>0.5</sub> S <sub>4</sub>    | Na <sub>96</sub> In <sub>12</sub> V <sub>12</sub> S <sub>96</sub>  | Na <sub>4</sub> SnS <sub>4</sub>                                     | 15.830 | 15.830 | 13.822 | 90.000 | 90.000 | 90.000 | 3463.7 | 35.9 |
| Na <sub>4</sub> In <sub>0.5</sub> V <sub>0.5</sub> S <sub>4</sub>    | Na <sub>64</sub> In <sub>8</sub> V <sub>8</sub> S <sub>64</sub>    | Na <sub>3</sub> VS <sub>4</sub>                                      | 15.310 | 14.424 | 16.386 | 87.890 | 90.168 | 87.426 | 3612.3 | 68.6 |
| Na <sub>4</sub> In <sub>0.5</sub> V <sub>0.5</sub> S <sub>4</sub>    | Na <sub>64</sub> In <sub>8</sub> V <sub>8</sub> S <sub>64</sub>    | Na <sub>3</sub> SbS <sub>4</sub>                                     | 20.277 | 13.405 | 21.038 | 90.621 | 89.971 | 89.915 | 5718.0 | 70.3 |
| Na <sub>4</sub> In <sub>0.5</sub> Nb <sub>0.5</sub> S <sub>4</sub>   | Na <sub>64</sub> In <sub>8</sub> Nb <sub>8</sub> S <sub>64</sub>   | Na <sub>5</sub> AlS <sub>4</sub>                                     | 12.341 | 14.497 | 21.644 | 91.067 | 89.627 | 89.418 | 3871.3 | 53.8 |
| Na <sub>4</sub> In <sub>0.5</sub> Nb <sub>0.5</sub> S <sub>4</sub>   | Na <sub>64</sub> In <sub>8</sub> Nb <sub>8</sub> S <sub>64</sub>   | Na <sub>3</sub> InS <sub>4</sub>                                     | 13.734 | 17.925 | 15.315 | 89.199 | 88.186 | 89.796 | 3767.8 | 34.8 |
| Na <sub>4</sub> In <sub>0.5</sub> Nb <sub>0.5</sub> S <sub>4</sub>   | Na <sub>64</sub> In <sub>8</sub> Nb <sub>8</sub> S <sub>64</sub>   | Na <sub>4.5</sub> Al <sub>0.5</sub> Si <sub>0.5</sub> S <sub>4</sub> | 18.133 | 14.160 | 14.717 | 89.714 | 93.364 | 89.577 | 3772.0 | 37.3 |
| Na <sub>4</sub> In <sub>0.5</sub> Nb <sub>0.5</sub> S <sub>4</sub>   | Na <sub>96</sub> In <sub>12</sub> Nb <sub>12</sub> S <sub>96</sub> | Na <sub>4</sub> SnS <sub>4</sub>                                     | 15.836 | 15.836 | 13.969 | 90.000 | 90.000 | 90.000 | 3503.3 | 23.5 |
| Na <sub>4</sub> In <sub>0.5</sub> Nb <sub>0.5</sub> S <sub>4</sub>   | Na <sub>64</sub> In <sub>8</sub> Nb <sub>8</sub> S <sub>64</sub>   | Na <sub>3</sub> VS <sub>4</sub>                                      | 14.799 | 14.470 | 17.068 | 89.110 | 88.201 | 88.816 | 3651.8 | 64.4 |
| Na <sub>4</sub> In <sub>0.5</sub> Nb <sub>0.5</sub> S <sub>4</sub>   | Na <sub>64</sub> In <sub>8</sub> Nb <sub>8</sub> S <sub>64</sub>   | Na <sub>3</sub> SbS <sub>4</sub>                                     | 20.598 | 13.690 | 20.627 | 89.555 | 90.625 | 90.787 | 5815.5 | 58.1 |
| Na <sub>4</sub> In <sub>0.5</sub> Sb <sub>0.5</sub> S <sub>4</sub>   | Na <sub>64</sub> In <sub>8</sub> Sb <sub>8</sub> S <sub>64</sub>   | Na <sub>5</sub> AlS <sub>4</sub>                                     | 12.390 | 14.411 | 21.110 | 90.680 | 89.885 | 89.314 | 3768.8 | 48.7 |
| Na <sub>4</sub> In <sub>0.5</sub> Sb <sub>0.5</sub> S <sub>4</sub>   | Na <sub>64</sub> In <sub>8</sub> Sb <sub>8</sub> S <sub>64</sub>   | Na <sub>3</sub> InS <sub>4</sub>                                     | 13.744 | 18.116 | 15.357 | 89.189 | 87.797 | 89.721 | 3820.6 | 37.5 |
| Na <sub>4</sub> In <sub>0.5</sub> Sb <sub>0.5</sub> S <sub>4</sub>   | Na <sub>96</sub> In <sub>12</sub> Sb <sub>12</sub> S <sub>96</sub> | Na <sub>4.5</sub> Al <sub>0.5</sub> Si <sub>0.5</sub> S <sub>4</sub> | 18.257 | 14.280 | 14.711 | 89.514 | 92.722 | 89.247 | 3830.7 | 44.1 |
| Na <sub>4</sub> In <sub>0.5</sub> Sb <sub>0.5</sub> S <sub>4</sub>   | Na <sub>96</sub> In <sub>12</sub> Sb <sub>12</sub> S <sub>96</sub> | Na <sub>4</sub> SiS <sub>4</sub>                                     | 42.153 | 9.4950 | 14.132 | 89.886 | 90.249 | 90.065 | 5656.0 | 36.6 |
| Na <sub>4</sub> In <sub>0.5</sub> Sb <sub>0.5</sub> S <sub>4</sub>   | Na <sub>64</sub> In <sub>8</sub> Sb <sub>8</sub> S <sub>64</sub>   | Na <sub>4</sub> SnS <sub>4</sub>                                     | 15.916 | 15.916 | 13.957 | 90.000 | 90.000 | 90.000 | 3535.6 | 17.4 |
| Na <sub>4</sub> In <sub>0.5</sub> Sb <sub>0.5</sub> S <sub>4</sub>   | Na <sub>64</sub> In <sub>8</sub> Sb <sub>8</sub> S <sub>64</sub>   | Na <sub>3</sub> VS <sub>4</sub>                                      | 14.857 | 15.198 | 16.623 | 89.589 | 87.892 | 89.608 | 3750.7 | 56.7 |
| Na <sub>4</sub> In <sub>0.5</sub> Sb <sub>0.5</sub> S <sub>4</sub>   | Na <sub>64</sub> In <sub>8</sub> Sb <sub>8</sub> S <sub>64</sub>   | Na <sub>3</sub> SbS <sub>4</sub>                                     | 20.936 | 13.919 | 20.249 | 90.720 | 88.452 | 89.507 | 5897.6 | 60.0 |
| Na <sub>4</sub> In <sub>0.5</sub> Ta <sub>0.5</sub> S <sub>4</sub>   | Na <sub>64</sub> In <sub>8</sub> Ta <sub>8</sub> S <sub>64</sub>   | Na <sub>5</sub> AlS <sub>4</sub>                                     | 12.350 | 14.500 | 21.647 | 91.009 | 89.503 | 89.417 | 3875.4 | 56.3 |
| Na <sub>4</sub> In <sub>0.5</sub> Ta <sub>0.5</sub> S <sub>4</sub>   | Na <sub>64</sub> In <sub>8</sub> Ta <sub>8</sub> S <sub>64</sub>   | Na <sub>3</sub> InS <sub>4</sub>                                     | 13.765 | 17.962 | 15.279 | 89.131 | 87.971 | 89.767 | 3775.0 | 36.8 |
| Na <sub>4</sub> In <sub>0.5</sub> Ta <sub>0.5</sub> S <sub>4</sub>   | Na <sub>96</sub> In <sub>12</sub> Ta <sub>12</sub> S <sub>96</sub> | Na <sub>4.5</sub> Al <sub>0.5</sub> Si <sub>0.5</sub> S <sub>4</sub> | 18.136 | 14.143 | 14.729 | 89.680 | 93.319 | 89.586 | 3771.5 | 39.9 |
| Na <sub>4</sub> In <sub>0.5</sub> Ta <sub>0.5</sub> S <sub>4</sub>   | Na <sub>96</sub> In <sub>12</sub> Ta <sub>12</sub> S <sub>96</sub> | Na <sub>4</sub> SiS <sub>4</sub>                                     | 42.515 | 9.2180 | 14.184 | 89.963 | 90.513 | 90.026 | 5558.5 | 38.8 |
| Na <sub>4</sub> In <sub>0.5</sub> Ta <sub>0.5</sub> S <sub>4</sub>   | Na <sub>64</sub> In <sub>8</sub> Ta <sub>8</sub> S <sub>64</sub>   | Na <sub>4</sub> SnS <sub>4</sub>                                     | 15.845 | 15.845 | 13.970 | 90.000 | 90.000 | 90.000 | 3507.2 | 26.0 |
| Na <sub>4</sub> In <sub>0.5</sub> Ta <sub>0.5</sub> S <sub>4</sub>   | Na <sub>64</sub> In <sub>8</sub> Ta <sub>8</sub> S <sub>64</sub>   | Na <sub>3</sub> VS <sub>4</sub>                                      | 14.899 | 14.593 | 16.949 | 89.268 | 88.186 | 88.355 | 3681.4 | 62.3 |
| Na <sub>4</sub> In <sub>0.5</sub> Ta <sub>0.5</sub> S <sub>4</sub>   | Na <sub>64</sub> In <sub>8</sub> Ta <sub>8</sub> S <sub>64</sub>   | Na <sub>3</sub> SbS <sub>4</sub>                                     | 21.081 | 13.973 | 20.244 | 89.628 | 87.973 | 89.403 | 5959.4 | 75.4 |
| Na <sub>3.5</sub> Si <sub>0.5</sub> Ta <sub>0.5</sub> S <sub>4</sub> | Na <sub>56</sub> Si <sub>8</sub> Ta <sub>8</sub> S <sub>64</sub>   | Na <sub>5</sub> AlS <sub>4</sub>                                     | 11.602 | 14.197 | 22.060 | 90.395 | 91.871 | 90.771 | 3631.3 | 44.7 |
| Na <sub>3.5</sub> Si <sub>0.5</sub> Ta <sub>0.5</sub> S <sub>4</sub> | Na <sub>56</sub> Si <sub>8</sub> Ta <sub>8</sub> S <sub>64</sub>   | Na <sub>3</sub> InS <sub>4</sub>                                     | 13.625 | 18.213 | 14.391 | 90.715 | 86.832 | 91.114 | 3565.0 | 30.6 |
| Na <sub>3.5</sub> Si <sub>0.5</sub> Ta <sub>0.5</sub> S <sub>4</sub> | Na <sub>56</sub> Si <sub>8</sub> Ta <sub>8</sub> S <sub>64</sub>   | Na <sub>4.5</sub> Al <sub>0.5</sub> Si <sub>0.5</sub> S <sub>4</sub> | 17.824 | 13.896 | 14.345 | 91.525 | 93.518 | 90.139 | 3545.0 | 31.7 |
| Na <sub>3.5</sub> Si <sub>0.5</sub> Ta <sub>0.5</sub> S <sub>4</sub> | Na <sub>84</sub> Si <sub>12</sub> Ta <sub>12</sub> S <sub>96</sub> | Na <sub>4</sub> SiS <sub>4</sub>                                     | 41.654 | 8.9369 | 14.080 | 90.072 | 89.220 | 90.088 | 5241.0 | 24.1 |
| Na <sub>3.5</sub> Si <sub>0.5</sub> Ta <sub>0.5</sub> S <sub>4</sub> | Na <sub>56</sub> Si <sub>8</sub> Ta <sub>8</sub> S <sub>64</sub>   | Na <sub>4</sub> SnS <sub>4</sub>                                     | 15.802 | 15.445 | 13.845 | 90.360 | 90.620 | 89.424 | 3378.6 | 24.3 |
| Na <sub>3.5</sub> Si <sub>0.5</sub> Ta <sub>0.5</sub> S <sub>4</sub> | Na <sub>56</sub> Si <sub>8</sub> Ta <sub>8</sub> S <sub>64</sub>   | Na <sub>3</sub> VS <sub>4</sub>                                      | 14.192 | 13.926 | 16.324 | 89.917 | 89.817 | 89.664 | 3226.1 | 42.6 |

**Table S2** Na-ion conductivity  $\sigma_{Na,T}$  (in S·cm<sup>-1</sup>) and Na-ion self-diffusion coefficient  $D_{Na,T}$  (in cm<sup>2</sup>·s<sup>-1</sup>) for the 11 compositions adopted in the multi-temperature diagnosis with  $\Delta\tau = 1$  fs,  $\tau = 100$  ps, and  $T = 500, 600, 700, 800,$  and  $800$  K (“-” denotes the absence of observed Na-ion migrations). By extrapolating the values in the Arrhenius plots [see Figures 1(i) and 2(h)], Na-ion activation energies  $E_a$  and  $\sigma_{Na,300K}$  were estimated as well. In  $E_a$ , the standard errors are presented. In the first row, the compositions per unit cell are presented in parentheses.

| Composition                                                                | $\sigma_{Na,300K}$<br>( $D_{Na,300K}$ )              | $\sigma_{Na,500K}$<br>( $D_{Na,500K}$ )             | $\sigma_{Na,600K}$<br>( $D_{Na,600K}$ )            | $\sigma_{Na,700K}$<br>( $D_{Na,700K}$ )            | $\sigma_{Na,800K}$<br>( $D_{Na,800K}$ )            | $\sigma_{Na,900K}$<br>( $D_{Na,900K}$ )            | $E_a$<br>(meV)    |
|----------------------------------------------------------------------------|------------------------------------------------------|-----------------------------------------------------|----------------------------------------------------|----------------------------------------------------|----------------------------------------------------|----------------------------------------------------|-------------------|
| $Na_4SiS_4$<br>( $Na_{96}Si_{24}S_{96}$ )                                  | $2.57 \times 10^{-15}$<br>( $2.00 \times 10^{-20}$ ) | -                                                   | $7.01 \times 10^{-5}$<br>( $1.26 \times 10^{-9}$ ) | $3.48 \times 10^{-4}$<br>( $7.43 \times 10^{-9}$ ) | $1.38 \times 10^{-2}$<br>( $3.40 \times 10^{-7}$ ) | $1.16 \times 10^{-1}$<br>( $3.27 \times 10^{-6}$ ) | 1250<br>$\pm 145$ |
| $Na_4Ga_{0.125}Si_{0.75}P_{0.125}S_4$<br>( $Na_{96}Ga_3Si_{18}P_3S_{96}$ ) | $2.26 \times 10^{-11}$<br>( $1.84 \times 10^{-16}$ ) | $4.47 \times 10^{-5}$<br>( $6.69 \times 10^{-10}$ ) | -                                                  | $1.14 \times 10^{-2}$<br>( $2.45 \times 10^{-7}$ ) | $1.98 \times 10^{-1}$<br>( $4.99 \times 10^{-6}$ ) | $4.11 \times 10^{-1}$<br>( $1.18 \times 10^{-5}$ ) | 965<br>$\pm 43.1$ |
| $Na_4Ga_{0.25}Si_{0.5}P_{0.25}S_4$<br>( $Na_{96}Ga_6Si_{12}P_6S_{96}$ )    | $9.48 \times 10^{-9}$<br>( $7.89 \times 10^{-14}$ )  | $5.11 \times 10^{-4}$<br>( $7.73 \times 10^{-9}$ )  | $7.39 \times 10^{-3}$<br>( $1.35 \times 10^{-7}$ ) | $1.66 \times 10^{-1}$<br>( $3.63 \times 10^{-6}$ ) | $1.25 \times 10^{-1}$<br>( $3.15 \times 10^{-6}$ ) | $7.13 \times 10^{-1}$<br>( $2.05 \times 10^{-5}$ ) | 747<br>$\pm 88.1$ |
| $Na_4Ga_{0.375}Si_{0.25}P_{0.375}S_4$<br>( $Na_{96}Ga_9Si_6P_9S_{96}$ )    | $6.03 \times 10^{-11}$<br>( $4.89 \times 10^{-16}$ ) | $4.52 \times 10^{-5}$<br>( $6.83 \times 10^{-10}$ ) | $1.04 \times 10^{-2}$<br>( $1.92 \times 10^{-7}$ ) | $1.88 \times 10^{-2}$<br>( $4.07 \times 10^{-7}$ ) | $2.12 \times 10^{-1}$<br>( $5.39 \times 10^{-6}$ ) | $7.08 \times 10^{-1}$<br>( $2.07 \times 10^{-5}$ ) | 948<br>$\pm 111$  |
| $Na_4Ga_{0.5}P_{0.5}S_4$<br>( $Na_{96}Ga_{12}P_{12}S_{96}$ )               | $9.71 \times 10^{-4}$<br>( $7.92 \times 10^{-9}$ )   | $7.00 \times 10^{-2}$<br>( $1.07 \times 10^{-6}$ )  | $1.51 \times 10^{-1}$<br>( $2.78 \times 10^{-6}$ ) | $1.48 \times 10^{-1}$<br>( $3.28 \times 10^{-6}$ ) | $6.39 \times 10^{-1}$<br>( $1.65 \times 10^{-5}$ ) | $8.24 \times 10^{-1}$<br>( $2.41 \times 10^{-5}$ ) | 297<br>$\pm 56.3$ |
| $Na_{3.75}Ga_{0.375}P_{0.625}S_4$<br>( $Na_{90}Ga_9P_{15}S_{96}$ )         | $2.07 \times 10^{-3}$<br>( $1.77 \times 10^{-8}$ )   | $1.19 \times 10^{-1}$<br>( $1.91 \times 10^{-6}$ )  | $2.77 \times 10^{-1}$<br>( $5.41 \times 10^{-6}$ ) | $4.35 \times 10^{-1}$<br>( $1.02 \times 10^{-5}$ ) | $9.44 \times 10^{-1}$<br>( $2.55 \times 10^{-5}$ ) | $1.30 \times 10^0$<br>( $4.07 \times 10^{-5}$ )    | 290<br>$\pm 18.0$ |
| $Na_{4.25}Ga_{0.625}P_{0.375}S_4$<br>( $Na_{102}Ga_{15}P_9S_{96}$ )        | $6.57 \times 10^{-4}$<br>( $5.26 \times 10^{-9}$ )   | $4.96 \times 10^{-2}$<br>( $7.23 \times 10^{-7}$ )  | $1.83 \times 10^{-1}$<br>( $3.27 \times 10^{-6}$ ) | $2.61 \times 10^{-1}$<br>( $5.47 \times 10^{-6}$ ) | $4.52 \times 10^{-1}$<br>( $1.10 \times 10^{-5}$ ) | $8.61 \times 10^{-1}$<br>( $2.41 \times 10^{-5}$ ) | 316<br>$\pm 22.6$ |
| $Na_{3.875}Si_{0.875}Ta_{0.125}S_4$<br>( $Na_{93}Si_{21}Ta_3S_{96}$ )      | $4.93 \times 10^{-5}$<br>( $4.22 \times 10^{-10}$ )  | $2.06 \times 10^{-2}$<br>( $3.19 \times 10^{-7}$ )  | $6.53 \times 10^{-2}$<br>( $1.24 \times 10^{-6}$ ) | $1.47 \times 10^{-1}$<br>( $3.30 \times 10^{-6}$ ) | $4.06 \times 10^{-1}$<br>( $1.05 \times 10^{-5}$ ) | $8.40 \times 10^{-1}$<br>( $2.48 \times 10^{-5}$ ) | 413<br>$\pm 27.4$ |
| $Na_{3.75}Si_{0.75}Ta_{0.25}S_4$<br>( $Na_{90}Si_{18}Ta_6S_{96}$ )         | $2.36 \times 10^{-3}$<br>( $2.10 \times 10^{-8}$ )   | $8.62 \times 10^{-2}$<br>( $1.39 \times 10^{-6}$ )  | $1.38 \times 10^{-1}$<br>( $2.72 \times 10^{-6}$ ) | $9.09 \times 10^{-2}$<br>( $2.11 \times 10^{-6}$ ) | $4.26 \times 10^{-1}$<br>( $1.14 \times 10^{-5}$ ) | $6.83 \times 10^{-1}$<br>( $2.09 \times 10^{-5}$ ) | 246<br>$\pm 77.5$ |
| $Na_{3.625}Si_{0.625}Ta_{0.375}S_4$<br>( $Na_{87}Si_{15}Ta_9S_{96}$ )      | $4.53 \times 10^{-3}$<br>( $4.25 \times 10^{-8}$ )   | $1.12 \times 10^{-1}$<br>( $1.91 \times 10^{-6}$ )  | $4.70 \times 10^{-1}$<br>( $9.75 \times 10^{-6}$ ) | $3.78 \times 10^{-1}$<br>( $9.23 \times 10^{-6}$ ) | $7.64 \times 10^{-1}$<br>( $2.14 \times 10^{-5}$ ) | $1.02 \times 10^0$<br>( $3.32 \times 10^{-5}$ )    | 252<br>$\pm 40.8$ |
| $Na_{3.5}Si_{0.5}Ta_{0.5}S_4$<br>( $Na_{84}Al_{12}Ta_{12}S_{96}$ )         | $1.35 \times 10^{-2}$<br>( $1.27 \times 10^{-7}$ )   | $2.53 \times 10^{-1}$<br>( $4.47 \times 10^{-6}$ )  | $3.90 \times 10^{-1}$<br>( $8.39 \times 10^{-6}$ ) | $5.34 \times 10^{-1}$<br>( $1.35 \times 10^{-5}$ ) | $1.03 \times 10^0$<br>( $3.07 \times 10^{-5}$ )    | $1.23 \times 10^0$<br>( $4.22 \times 10^{-5}$ )    | 215<br>$\pm 21.7$ |



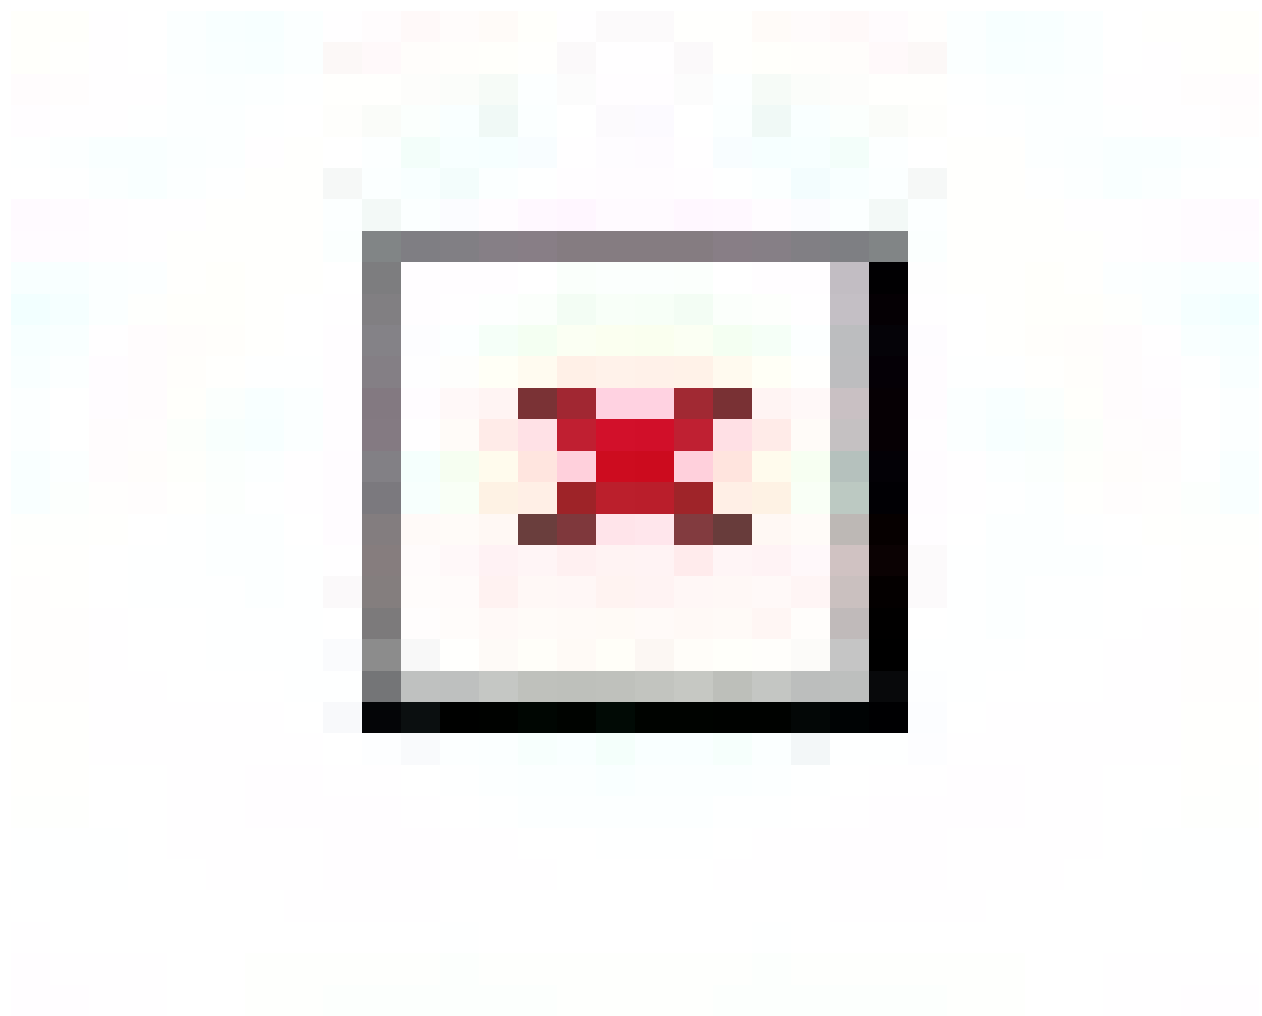

**Figure S1** Mean squared displacement (MSD) curves against sampled time intervals  $\Delta\tau_{MSD}$  given by the multi-temperature diagnosis (with  $\Delta\tau = 1$  fs and  $\tau = 100$  ps at  $T = 500, 600, 700, 800,$  and  $900$  K) for the seven samples within  $(M, M', \Omega) = (Ga, P, Na_4SiS_4)$ : (a)  $Na_4SiS_4$ , (b)  $Na_4Ga_{0.125}Si_{0.75}P_{0.125}S_4$ , (c)  $Na_4Ga_{0.25}Si_{0.5}P_{0.25}S_4$ , (d)  $Na_4Ga_{0.375}Si_{0.25}P_{0.375}S_4$ , (e)  $Na_4Ga_{0.5}P_{0.5}S_4$ , (f)  $Na_{3.75}Ga_{0.375}P_{0.625}S_4$ , and (g)  $Na_{4.25}Ga_{0.625}P_{0.375}S_4$ . The dashed lines with slopes represent regression analyses, and the insets present the trajectory density plot at  $T = 500$  K represented by yellow isosurfaces.

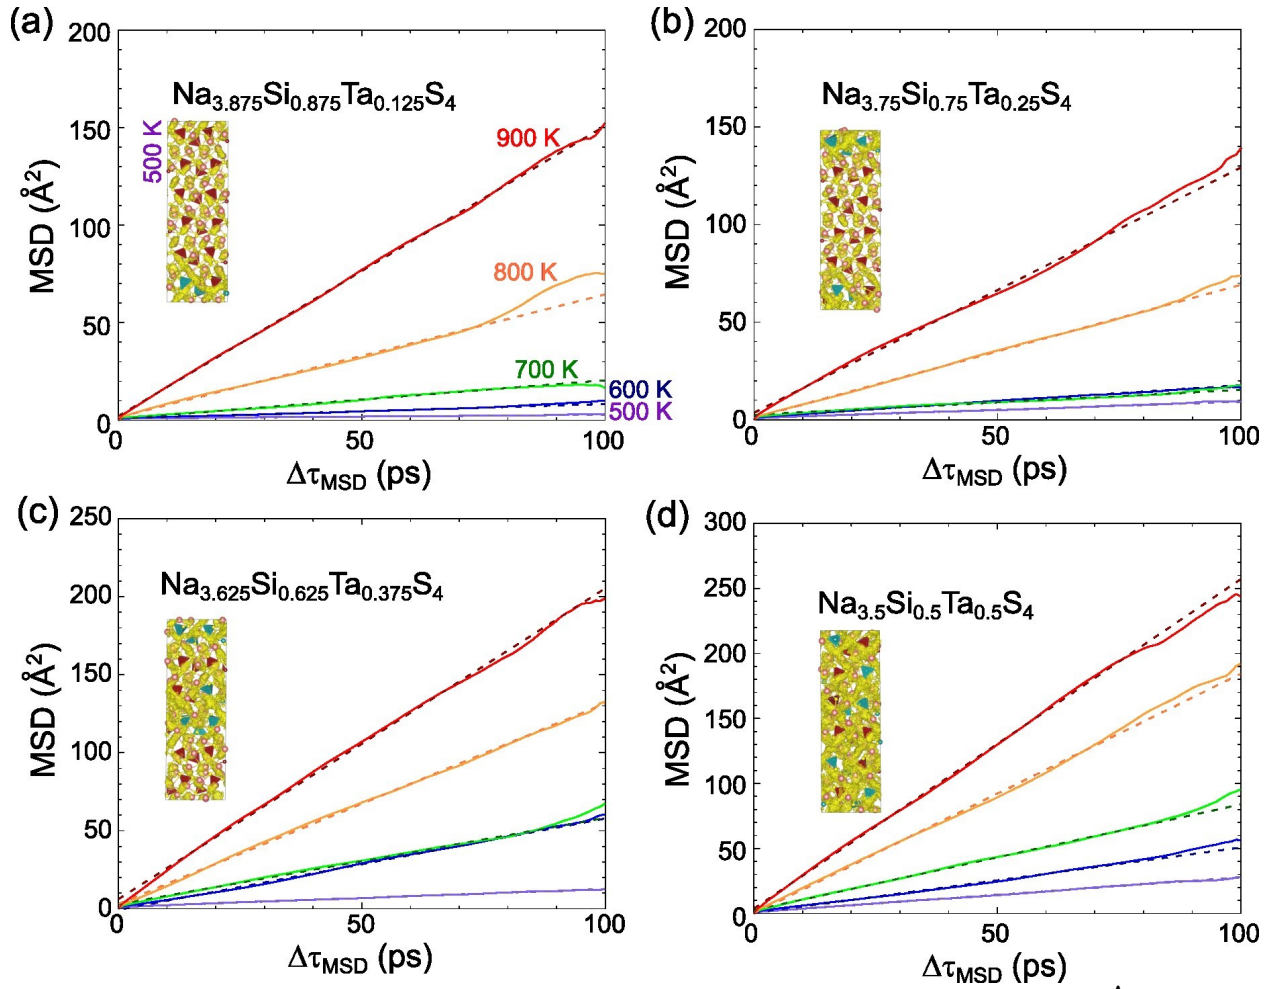

**Figure S2** Mean squared displacement (MSD) curves against sampled time intervals  $\Delta\tau_{MSD}$  given by the multi-temperature diagnosis (with  $\Delta\tau = 1$  fs and  $\tau = 100$  ps at  $T = 500, 600, 700, 800,$  and  $900$  K) for the four samples within  $(M, M', \Omega) = (Si, Ta, Na_4SiS_4)$ :  $Na_{3.875}Si_{0.875}Ta_{0.125}S_4$ ,  $Na_{3.75}Si_{0.75}Ta_{0.25}S_4$ ,  $Na_{3.625}Si_{0.625}Ta_{0.375}S_4$ , and  $Na_{3.5}Si_{0.5}Ta_{0.5}S_4$ . For the MSD curves of  $Na_4SiS_4$ , Figure S1a is referred to. The dashed lines with slopes represent regression analyses, and the insets present the trajectory density plot at  $T = 500$  K represented by yellow isosurfaces.

## Discussion S2 Electrochemical stability windows

We present the electrochemical stability windows and decomposition phases for the materials systems  $(M, M', \Omega) = (Ga, P, Na_4SiS_4)$  and  $(Si, Ta, Na_4SiS_4)$  in Table S3. These values were calculated using the Computational Phase Diagram App provided by MaterialsProject.org.<sup>25, 26</sup> The electrochemical stability window for  $Na_4Ga_{0.125}Si_{0.75}P_{0.125}S_4$ ,  $Na_4Ga_{0.25}Si_{0.5}P_{0.25}S_4$ ,  $Na_4Ga_{0.375}Si_{0.25}P_{0.375}S_4$ ,  $Na_4Ga_{0.5}P_{0.5}S_4$ ,  $Na_{3.75}Ga_{0.375}P_{0.625}S_4$ , and  $Na_{4.25}Ga_{0.625}P_{0.375}S_4$  is [1.24, 1.55] V vs. Na/Na<sup>+</sup>, with multiple decomposition phases identified as  $Na_4SiS_4$ ,  $Na_3GaS_3$ ,  $Na_3PS_4$ , and  $Na_2S$ . When these decomposition phases form around solid interface regions, such as at the anode and cathode, the interphase-controlled electrochemical stability windows extend to [0.77, 2.12] V vs. Na/Na<sup>+</sup>.

Similarly, the electrochemical stability window for  $Na_{3.875}Si_{0.875}Ta_{0.125}S_4$ ,  $Na_{3.75}Si_{0.75}Ta_{0.25}S_4$ ,  $Na_{3.625}Si_{0.625}Ta_{0.375}S_4$ , and  $Na_{3.5}Si_{0.5}Ta_{0.5}S_4$  is [1.00, 1.91] V vs. Na/Na<sup>+</sup>, with decomposition phases being  $Na_4SiS_4$  and  $Na_3TaS_4$ . The interphase-controlled electrochemical stability window for these materials extends to [0.77, 2.03] V versus Na/Na<sup>+</sup>. Given that the narrow electrochemical stability windows for  $(M, M', \Omega) = (Ga, P, Na_4SiS_4)$  and  $(Si, Ta, Na_4SiS_4)$  are not significantly improved by interphase control, it is advisable to incorporate electrochemically stable interphase layers in battery design.<sup>32</sup> This is particularly important at the interfaces between the solid electrolyte and the anode, as well as between the solid electrolyte and the cathode.

**Table S3.** Electrochemical stability windows for the 11 compositions and decomposition phases adopted in the multi-temperature diagnosis.

| Composition                           | Electrochemical stability windows (potential $\phi$ in V vs. Na/Na <sup>+</sup> )<br>(Corresponding decomposition phases if exist) |
|---------------------------------------|------------------------------------------------------------------------------------------------------------------------------------|
| $Na_4SiS_4$                           | [0.77, 1.91]                                                                                                                       |
| $Na_4Ga_{0.125}Si_{0.75}P_{0.125}S_4$ | [1.24, 1.55]<br>( $Na_4SiS_4, Na_3GaS_3, Na_3PS_4, Na_2S$ )                                                                        |
| $Na_4Ga_{0.25}Si_{0.5}P_{0.25}S_4$    | [1.24, 1.55]<br>( $Na_4SiS_4, Na_3GaS_3, Na_3PS_4, Na_2S$ )                                                                        |
| $Na_4Ga_{0.375}Si_{0.25}P_{0.375}S_4$ | [1.24, 1.55]<br>( $Na_4SiS_4, Na_3GaS_3, Na_3PS_4, Na_2S$ )                                                                        |
| $Na_4Ga_{0.5}P_{0.5}S_4$              | [1.24, 1.55]<br>( $Na_3GaS_3, Na_3PS_4, Na_2S$ )                                                                                   |
| $Na_{3.75}Ga_{0.375}P_{0.625}S_4$     | [1.24, 1.55]<br>( $Na_3GaS_3, Na_3PS_4, Na_2S$ )                                                                                   |
| $Na_{4.25}Ga_{0.625}P_{0.375}S_4$     | [1.24, 1.55]<br>( $Na_3GaS_3, Na_3PS_4, Na_2S$ )                                                                                   |
| $Na_{3.875}Si_{0.875}Ta_{0.125}S_4$   | [1.00, 1.91]<br>( $Na_4SiS_4, Na_3TaS_4$ )                                                                                         |
| $Na_{3.75}Si_{0.75}Ta_{0.25}S_4$      | [1.00, 1.91]<br>( $Na_4SiS_4, Na_3TaS_4$ )                                                                                         |
| $Na_{3.625}Si_{0.625}Ta_{0.375}S_4$   | [1.00, 1.91]<br>( $Na_4SiS_4, Na_3TaS_4$ )                                                                                         |
| $Na_{3.5}Si_{0.5}Ta_{0.5}S_4$         | [1.00, 1.91]<br>( $Na_4SiS_4, Na_3TaS_4$ )                                                                                         |
| $Na_3GaS_3$                           | [0.79, 1.65]                                                                                                                       |
| $Na_3PS_4$                            | [1.24, 2.12]                                                                                                                       |
| $Na_2S$                               | [0, 1.55]                                                                                                                          |
| $Na_3TaS_4$                           | [1.00, 2.03]                                                                                                                       |

## References

1. Harm, S.; Hatz, A.; Schneider, C.; Hoefler, C. A.; Hoch, C.; Lotsch, B. V. Finding the Right Blend: Interplay between Structure and Sodium Ion Conductivity in the System  $\text{Na}_5\text{AlS}_4\text{-Na}_4\text{SiS}_4$ . *Front. Chem.* **2020**, *8*, 90. DOI: 10.3389/fchem.2020.00090
2. Brown, A.; Tani, B. Powder X-Ray Diffraction Identification of Some New Phases in the  $\text{Na}_2\text{S-Al}_2\text{S}_3$  System. *Mat. Res. Bull.* **1987**, *22* (8), 1029–1037. DOI: 10.1016/0025-5408(87)90231-5
3. Eisenmann, B.; Hofmann, A. Crystal Structure of Pentasodium Tetrathioindate(III),  $\text{Na}_5\text{InS}_4$ . *Z. Kristallogr. Crysta. Mater.* **1991**, *197* (1–2), 169–170. DOI: 10.1524/zkri.1991.197.1-2.169
4. Tanibata, N.; Noi, K.; Hayashi, A.; Tatsumisago, M. Preparation and Characterization of Highly Sodium Ion Conducting  $\text{Na}_3\text{PS}_4\text{-Na}_4\text{SiS}_4$  Solid Electrolytes. *RSC Adv.* **2014**, *4* (33), 17120–17123. DOI: 10.1039/c4ra00996g
5. Tanibata, N.; Noi, K.; Hayashi, A.; Kitamura, N.; Idemoto, Y.; Tatsumisago, M. X-Ray Crystal Structure Analysis of Sodium-Ion Conductivity in  $94\text{Na}_3\text{PS}_4\cdot 6\text{Na}_4\text{SiS}_4$  Glass-Ceramic Electrolytes. *ChemElectroChem* **2014**, *1* (7), 1130–1132. DOI: 10.1002/celec.201402016
6. Tanibata, N.; Hayashi, A.; Tatsumisago, M. Improvement of Rate Performance for All-Solid-State  $\text{Na}_{15}\text{Sn}_4/\text{Amorphous TiS}_3$  Cells Using  $94\text{Na}_3\text{PS}_4\cdot 6\text{Na}_4\text{SiS}_4$  Glass-Ceramic Electrolytes. *J. Electrochem. Soc.* **2015**, *162* (6), A793–A795. DOI: 10.1149/2.0011506jes

7. Heo, J. W.; Banerjee, A.; Park, K. H.; Jung, Y. S.; Hong, S. New Na-Ion Solid Electrolytes  $\text{Na}_{4-x}\text{Sn}_{1-x}\text{Sb}_x\text{S}_4$  ( $0.02 \leq x \leq 0.33$ ) for All-Solid-State Na-Ion Batteries. *Adv. Energy Mater.* **2018**, *8* (11), 1702716–1702716. DOI: 10.1002/aenm.201702716
8. Xiong, S.; Liu, Z.; Yang, L.; Ma, Y.; Xu, W.; Bai, J.; Chen, H. Anion and Cation Co-Doping of  $\text{Na}_4\text{SnS}_4$  as Sodium Superionic Conductors. *Mater. Today Phys.* **2020**, *15*, 100281–100288. DOI: 10.1016/j.mtphys.2020.100281
9. Jumas, J.-C.; Philippot, E.; Vermot-Gaud-Daniel, F.; Ribes, M.; Maurin, M. Etude de la tétracoordination de l'étain dans deux orthothiostannates:  $\text{Na}_4\text{SnS}_4$  et  $\text{Ba}_2\text{SnS}_4$  ( $\alpha$ ). *J. Solid State Chem.* **1975**, *14* (4), 319–327. DOI: 10.1016/0022-4596(75)90050-x
10. He, Y.; Lu, F.; Kuang, X. Enhanced Sodium Ion Conductivity in  $\text{Na}_3\text{VS}_4$  by P-Doping. *RSC Adv.* **2019**, *9* (67), 39180–39186. DOI: 10.1039/c9ra08900d
11. Peskov, M. V.; Blatov, V. A. Comparative Crystal-Chemical Analysis of *d*-Metal Sulfides, Selenides, and Tellurides and Binary Compounds. *Russ. J. Inorg.* **2006**, *51* (4), 590–598. DOI: 10.1134/s0036023606040140
12. Klepp, K. O.; Gabl, G. New Complex Sulfides of the VA-Metals: Preparation and Crystal Structure of  $\text{Na}_3\text{VS}_4$  (With a Note on the Crystal Structure of the Low Temperature Modification of  $\text{Na}_3\text{PO}_4$ ). *Eur. J. Solid State Inorg. Chem.* **1997**, *34* (10), 1143–1154.
13. Graf, H.; Schäfer, H. Zur Strukturchemie der Alkalisalze der Tetrathiosäuren der Elemente der 5. Hauptgruppe. *Z. Anorg. Allg. Chem.* **1976**, *425* (1), 67–80. DOI: 10.1002/zaac.19764250109.

14. Wang, H.; Chen, Y.; Hood, Z. D.; Sahu, G.; Amaresh Samuthira Pandian; Keum, J. K.; An, K.; Liang, C. An Air-Stable Na<sub>3</sub>SbS<sub>4</sub> Superionic Conductor Prepared by a Rapid and Economic Synthetic Procedure. *Angew. Chem.* **2016**, *55* (30), 8551–8555. DOI: 10.1002/anie.201601546
15. Banerjee, A.; Park, K. H.; Heo, J. W.; Nam, Y. J.; Moon, C. K.; Oh, S. M.; Hong, S.-T.; Jung, Y. S. Na<sub>3</sub>SbS<sub>4</sub>: A Solution Processable Sodium Superionic Conductor for All-Solid-State Sodium-Ion Batteries. *Angew. Chem. Int. Ed.* **2016**, *55* (33), 9634–9638. DOI: 10.1002/anie.201604158
16. Ewald, P. P. Die Berechnung Optischer und Elektrostatischer Gitterpotentiale. *Ann. Phys.* **1921**, *369* (3), 253–287. DOI: 10.1002/andp.19213690304
17. Toukmaji, A. Y.; Board, J. A. Ewald Summation Techniques in Perspective: A Survey. *Comput. Phys. Commun.* **1996**, *95* (2–3), 73–92. DOI: 10.1016/0010-4655(96)00016-1
18. Jang, S.; Jalem, R.; Tateyama, Y. *EwaldSolidSolution*: A High-Throughput Application to Quickly Sample Stable Site Arrangements for Ionic Solid Solutions. *J. Phys. Chem. A* **2023**, *127* (27), 5734–5744. DOI: 10.1021/acs.jpca.3c00076
19. Blöchl, P. E. Projector Augmented-Wave Method. *Phys. Rev. B* **1994**, *50* (24), 17953-17979. DOI: 10.1103/PhysRevB.50.17953
20. Perdew, J. P.; Burke, K.; Ernzerhof, M. Generalized Gradient Approximation Made Simple. *Phys. Rev. Lett.* **1996**, *77* (18), 3865-3868. DOI: 10.1103/PhysRevLett.77.3865

21. Kresse, G.; Furthmüller, J. Efficiency of Ab-initio Total Energy Calculations for Metals and Semiconductors Using a Plane-Wave Basis Set. *Comp. Mater. Sci.* **1996**, *6* (1), 15-50. DOI: 10.1016/0927-0256(96)00008-0
22. Kresse, G.; Furthmüller, J. Efficient Iterative Schemes for Ab Initio Total-Energy Calculations Using a Plane-Wave Basis Set. *Phys. Rev. B* **1996**, *54* (16), 11169-11186. DOI: 10.1103/PhysRevB.54.11169
23. Kresse, G.; Joubert, D. From Ultrasoft Pseudopotentials to the Projector Augmented-Wave Method. *Phys. Rev. B* **1999**, *59* (3), 1758-1775. DOI: 10.1103/PhysRevB.59.1758
24. Monkhorst, H. J.; Pack, J. D. Special Points for Brillouin-Zone Integrations. *Phys. Rev. B* **1976**, *13* (12), 5188-5192. DOI: 10.1103/PhysRevB.13.5188
25. Ong, S. P.; Wang, L.; Kang, B.; Ceder, G. The Li-Fe-P-O<sub>2</sub> Phase Diagram from First Principles Calculations. *Chem. Mater.* **2008**, *20* (5), 1798-1807. DOI: 10.1021/cm702327g
26. Ong, S. P.; Jain, A.; Hautier, G.; Kang, B.; Ceder, G. Thermal Stabilities of Delithiated Olivine MPO<sub>4</sub> (M=Fe, Mn) Cathodes Investigated Using First Principles Calculations. *Electrochem. commun.* **2020**, *12* (3), 427-430. DOI: 10.1016/j.elecom.2010.01.010
27. Heyd, J.; Scuseria, G. E.; Ernzerhof, M. Hybrid Functionals Based on a Screened Coulomb Potential. *J. Chem. Phys.* **2003**, *118* (18), 8207-8215. DOI: 10.1063/1.1564060
28. Nosé, S. A Unified Formulation of the Constant Temperature Molecular Dynamics Methods. *J. Chem. Phys.* **1984**, *81* (1), 511-519. DOI: 10.1063/1.447334



29. Hoover, W. G. Canonical Dynamics: Equilibrium Phase-Space Distributions. *Phys. Rev. A* **1985**, *31* (3), 1695-1697. DOI: 10.1103/PhysRevA.31.1695
30. Parrinello, M.; Rahman, A. Crystal structure and pair potentials: a molecular-dynamics study. *Phys. Rev. Lett.* **1980**, *45* (14), 1196-1199. DOI: 10.1103/PhysRevLett.45.1196
31. Parrinello, M.; Rahman, A. Polymorphic transitions in single crystals: a new molecular dynamics method. *J. Appl. Phys.* **1981**, *52* (12), 7182-7190. DOI: 10.1063/1.328693
32. Niu, Y.; Yu, Z.; Zhou, Y.; Tang, J.; Li, M.; Zhuang, Z.; Yang, Y.; Huang, X.; Tian, B. Constructing stable Li-solid electrolyte interphase to achieve dendrites-free solid-state battery: A nano-interlayer/Li pre-reduction strategy. *Nano Res.* **2022**, *15* (8), 7180-7189. DOI: 10.1007/s12274-022-4362-y
